# Supplementary material for: Mammalian splicing divergence is shaped by drift, buffering in trans, and a scaling law
Source: Life Sci Alliance. 2021 Dec 30;5(4):e202101333. doi: 10.26508/lsa.202101333 (PMC8739531; doi:10.26508/lsa.202101333)
Supplement: Supplementary file 1 [file LSA-2021-01333_TableS1.xls]

## Sheet: Table S1
Table S1. Sequencing and mapping statistics.
Samples		Total read pairs (million	Uniquely mapped reads (million)	Proportion of concordantly mapped read pairs (%)	Assigned to alleles (million)	Fraction of reads assigned to alleles (%)
Liver	Replicate 1	268.1	226.7	0.8454	153.2	0.676
	Replicate 2	241.2	202.3	0.8385	134.5	0.6649
Cortex	Replicate 1	252.6	224.3	0.8879	145.6	0.6489
	Replicate 2	246.1	220.6	0.8964	143.3	0.6497
Heart	Replicate 1	256.1	223.6	0.8733	134.5	0.6012
	Replicate 2	251.1	219.2	0.873	132	0.6024
Kidney	Replicate 1	257.5	224.5	0.8718	139	0.6192
	Replicate 2	251.2	222.4	0.8852	141.6	0.6339
Spleen	Replicate 1	251.3	221.1	0.8796	146.7	0.6635
	Replicate 2	241	211.9	0.8794	140.3	0.6623
Lung	Replicate 1	277.2	251.3	0.9064	173.1	0.6886
	Replicate 2	243.2	218.6	0.8988	150	0.6862
ESC	Replicate 1	175	151.7	0.8664	95.9	0.6325
	Replicate 2	202	174.3	0.8627	109.2	0.6264
Average		243.8	213.8	0.8761	138.5	0.6468
