# Supplementary material for: Mammalian splicing divergence is shaped by drift, buffering in trans, and a scaling law
Source: Life Sci Alliance. 2021 Dec 30;5(4):e202101333. doi: 10.26508/lsa.202101333 (PMC8739531; doi:10.26508/lsa.202101333)
Supplement: Supplementary file 2 [file LSA-2021-01333_TableS2.xls]

## Sheet: Table S2
Table S2. Statistics of alternative splicing events across tissues.
	SE	A3SS	A5SS	RI
Cortex	10037	1628	957	1615
ESC	9544	1444	908	1512
Heart	8205	1414	824	1456
Kidney	9313	1551	913	1599
Liver	6093	1156	677	1297
Lung	9164	1548	905	1628
Spleen	8643	1507	888	1616
Total	15024	1970	1168	1871
