# Supplementary material for: Mammalian splicing divergence is shaped by drift, buffering in trans, and a scaling law
Source: Life Sci Alliance. 2021 Dec 30;5(4):e202101333. doi: 10.26508/lsa.202101333 (PMC8739531; doi:10.26508/lsa.202101333)
Supplement: Supplementary file 4 [file LSA-2021-01333_TableS4.xls]

## Sheet: Table S4
Table S4. Diversity of alternative splicing in each tissue according to PDI values of SE events.
PDI	Cortex	ESC	Heart	Kidney	Liver	Lung	Spleen
[0.5, 0.9]	5325	4660	3904	3933	2540	4020	4008
(0.9, 1.0]	4712	4884	4301	5380	3553	5144	4635
%[0.5, 0.9]	0.531	0.488	0.476	0.422	0.417	0.439	0.464
#genes with alt.SE	3111	2828	2439	2443	1722	2519	2582
%genes with alt.SE	0.217	0.219	0.197	0.182	0.157	0.179	0.195
