# Supplementary material for: Mammalian splicing divergence is shaped by drift, buffering in trans, and a scaling law
Source: Life Sci Alliance. 2021 Dec 30;5(4):e202101333. doi: 10.26508/lsa.202101333 (PMC8739531; doi:10.26508/lsa.202101333)
Supplement: Supplementary file 8 [file LSA-2021-01333_TableS8.xls]

## Sheet: Table S8
Table S8. Classification of the four scenarios under different cutoffs.
Cut-off	SC1	SC2	SC3	SC4	% SC3 in SC1,2,3	%SC3 replicates (BL6)	%SC3_replicates (SPR)
0.1	85	247	1655	456	83.3	47.9	47.6
0.125	42	202	1402	797	85.2	51.6	53.2
0.15	19	164	1149	1111	86.3	55.8	57.2
0.175	8	140	932	1363	86.3	56.9	58.4
0.2	1	121	761	1560	86.2	58.7	57.4
SC1,2,3,4: Scenario 1,2,3,4; The last two columns are percentages of SC3 based on classification with replicates from BL6 and SPR, respectively.
